# Supplementary material for: Dereplication of Known Nucleobase and Nucleoside Compounds in Natural Product Extracts by Capillary Electrophoresis-High Resolution Mass Spectrometry
Source: PubMed Central journal article supplement (PMC6272742; doi:10.3390/molecules20045423), 2015-03-26
Supplement: molecules-20-05423-s001.pdf [file molecules-20-05423-s001.pdf]

## Supplementary Materials

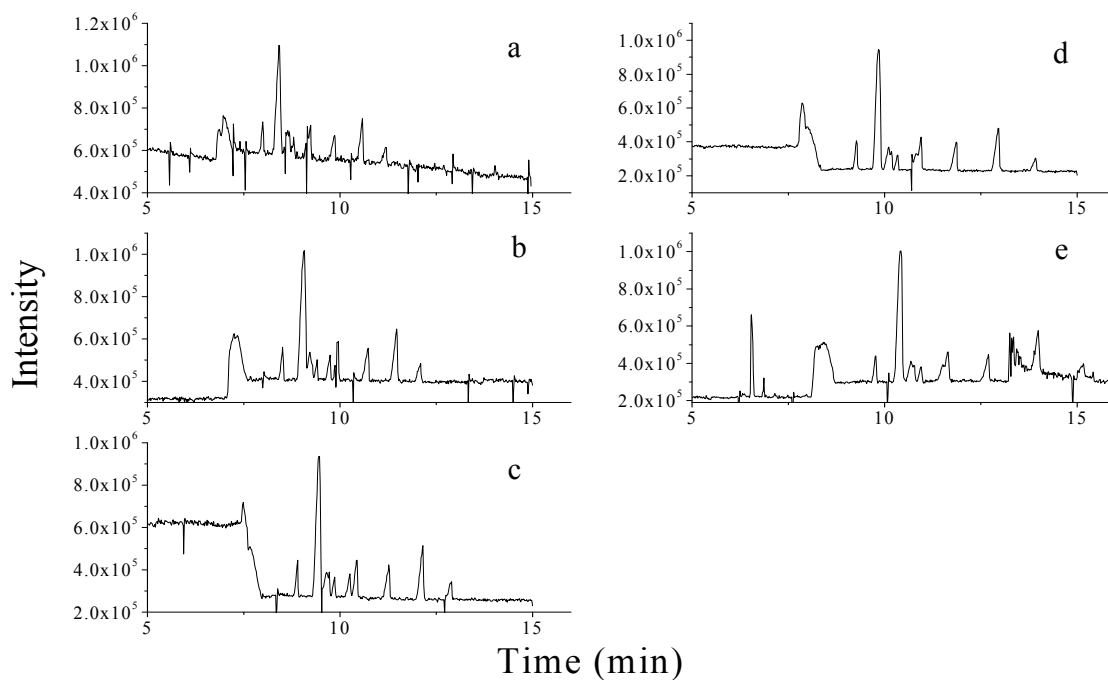

**Figure S1.** TIEs of mixed standards (including cytosine; uracil; thymine; adenine; hypoxanthine; guanine; xanthine; thymidine; cytidine; uridine; cordycepin; adenosine; 2'-deoxyguanosine; inosine and guanosine.) with different ammonium acetate concentrations. (a) 20 mM, (b) 25 mM, (c) 30 mM, (d) 35 mM, (e) 40 mM. The concentration of each diluted standard was 40  $\mu\text{g/mL}$ .

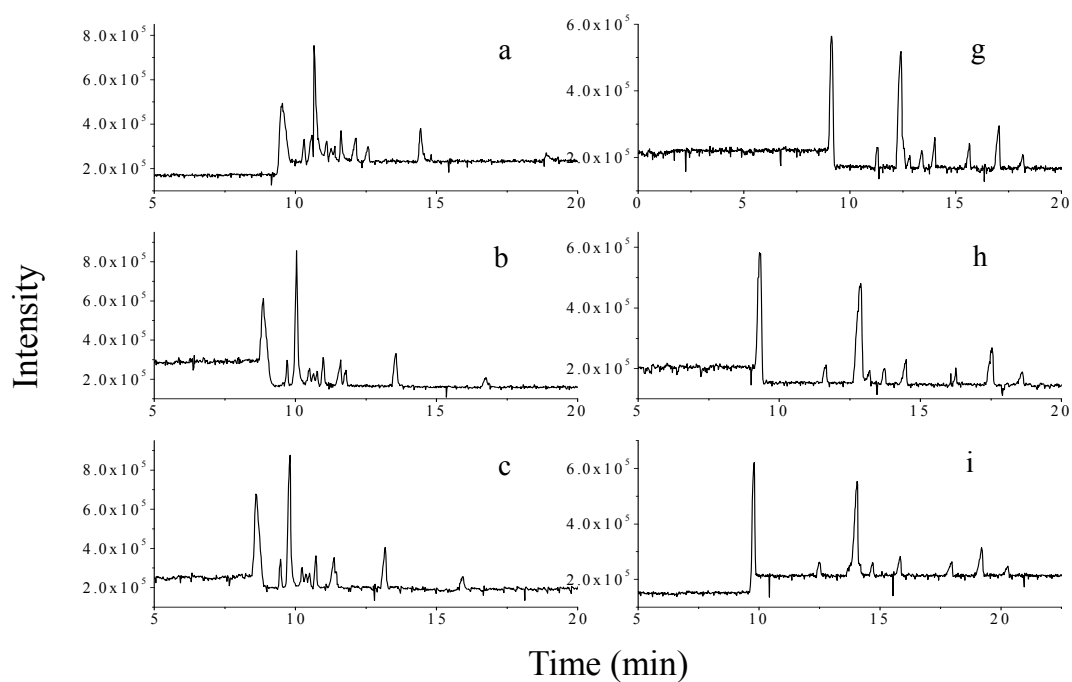

**Figure S2. Cont.**

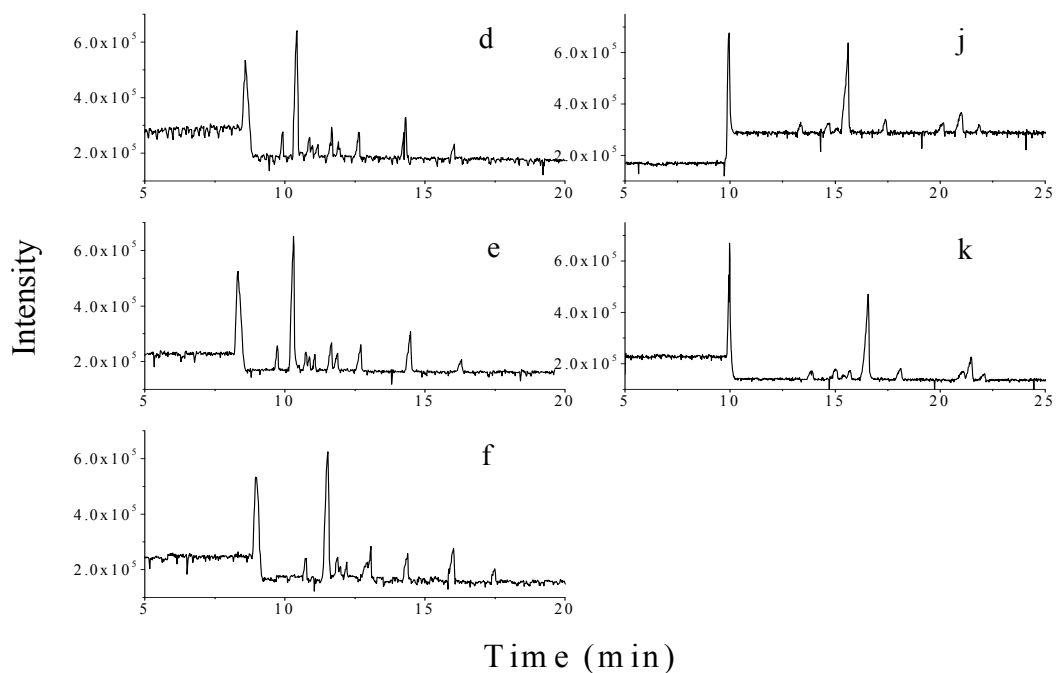

**Figure S2.** TIEs of mixed standards at different pH values. (a) pH9.5, (b) pH9.6, (c) pH 9.7, (d) pH 9.8, (e) pH 9.9, (f) pH 10.0, (g) pH 10.1, (h) pH 10.2, (i) pH10.3, (j) pH10.4, (k) pH10.5. The concentration of each diluted standard was 40  $\mu\text{g/mL}$ .

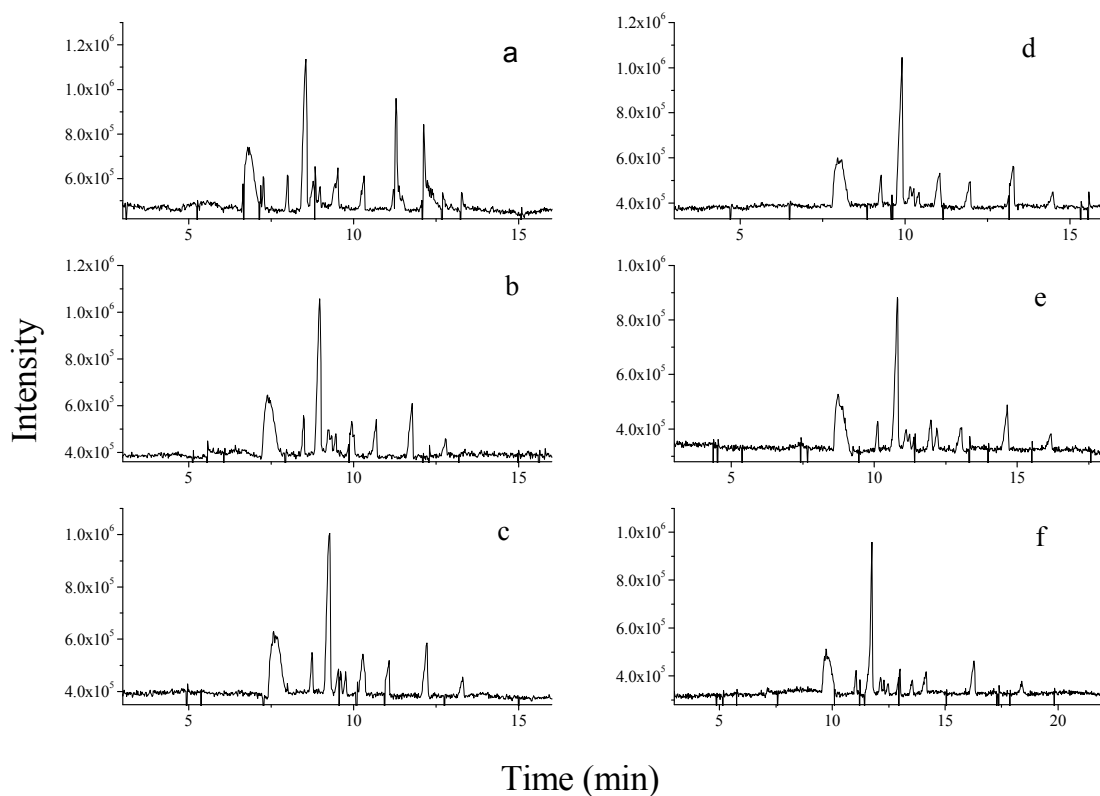

**Figure S3.** TIEs of mixed standards with different ratio of organic modifier (methanol) in buffer. (a) 0%, (b) 0.5%, (c) 1%, (d) 2%, (e) 5%, (f) 10%. The concentration of each diluted standard was 40  $\mu\text{g/mL}$ .

**Table S1.** CE-ESI-TOF/MS accurate mass measurements of 15 nucleobase and nucleoside compounds.

| Peak # | Compound ID       | Formula                                                       | [M+H] <sup>+</sup> | [M+Na] <sup>+</sup> | [2M+H] <sup>+</sup> | [M+K] <sup>+</sup> | Product Ions                                                                 |
|--------|-------------------|---------------------------------------------------------------|--------------------|---------------------|---------------------|--------------------|------------------------------------------------------------------------------|
| 1      | cytosine          | C <sub>4</sub> H <sub>5</sub> N <sub>3</sub> O                | 112.0507           | -                   | 223.0939            | -                  | -                                                                            |
| 2      | uracil            | C <sub>4</sub> H <sub>4</sub> N <sub>2</sub> O <sub>2</sub>   | 113.0348           | 135.0171            | -                   | 151.0606           | -                                                                            |
| 3      | thymine           | C <sub>5</sub> H <sub>6</sub> N <sub>2</sub> O <sub>2</sub>   | 127.0504           | -                   | -                   | -                  | -                                                                            |
| 4      | adenine           | C <sub>5</sub> H <sub>5</sub> N <sub>5</sub>                  | 136.0618           | -                   | -                   | -                  | -                                                                            |
| 5      | hypoxanthine      | C <sub>5</sub> H <sub>4</sub> N <sub>4</sub> O                | 137.0459           | 159.0274            | -                   | 175.0018           | -                                                                            |
| 6      | guanine           | C <sub>5</sub> H <sub>5</sub> N <sub>5</sub> O                | 152.0569           | 174.0384            | -                   | 190.0123           | -                                                                            |
| 7      | xanthine          | C <sub>5</sub> H <sub>4</sub> N <sub>4</sub> O <sub>2</sub>   | 153.0405           | 175.0230            | -                   | -                  | -                                                                            |
| 8      | thymidine         | C <sub>10</sub> H <sub>14</sub> N <sub>2</sub> O <sub>5</sub> | 243.0976           | 265.0799            | -                   | 281.0536           | [M-C <sub>5</sub> H <sub>8</sub> O <sub>3</sub> +H] <sup>+</sup><br>127.0504 |
| 9      | cytidine          | C <sub>9</sub> H <sub>13</sub> N <sub>3</sub> O <sub>5</sub>  | 244.0933           | 266.0756            | -                   | -                  | -                                                                            |
| 10     | uridine           | C <sub>9</sub> H <sub>12</sub> N <sub>2</sub> O <sub>6</sub>  | 245.0776           | 267.0589            | -                   | 283.0327           | -                                                                            |
| 11     | cordycepin        | C <sub>10</sub> H <sub>13</sub> N <sub>5</sub> O <sub>3</sub> | 252.1092           | 274.0914            | -                   | -                  | -                                                                            |
| 12     | adenosine         | C <sub>10</sub> H <sub>13</sub> N <sub>5</sub> O <sub>4</sub> | 268.1037           | 290.0860            | -                   | -                  | -                                                                            |
| 13     | 2'-deoxyguanosine | C <sub>10</sub> H <sub>13</sub> N <sub>5</sub> O <sub>4</sub> | 268.1037           | 290.0860            | -                   | 306.0598           | [M-C <sub>5</sub> H <sub>8</sub> O <sub>3</sub> +H] <sup>+</sup><br>152.0567 |
| 14     | inosine           | C <sub>10</sub> H <sub>12</sub> N <sub>4</sub> O <sub>5</sub> | 269.0881           | 291.0702            | -                   | 307.0436           | -                                                                            |
| 15     | guanosine         | C <sub>10</sub> H <sub>13</sub> N <sub>5</sub> O <sub>5</sub> | 284.0987           | 306.0753            | -                   | 322.0539           | [M+H-C <sub>5</sub> H <sub>8</sub> O <sub>4</sub> ] <sup>+</sup><br>152.0569 |

Note: Extracted ion electropherograms (EIEs) of 15 nucleobase and nucleoside standards are shown in Figure 1. Peak eluting earlier to peak 3 (in Figure 1) is a fragmentation ion of peak 8 (in Figure 1). The exact masses of peak 3 ([M+H]<sup>+</sup>) and the fragmentation ion of peak 8 ([M-C<sub>5</sub>H<sub>8</sub>O<sub>3</sub>+H]<sup>+</sup>) were consistent with the same elemental composition of C<sub>3</sub>H<sub>7</sub>N<sub>2</sub>O<sub>2</sub>. Peak eluting after peak 9 (in Figure 1) is the C<sub>13</sub> isotope peak of peak 8 ([M+H]<sup>+</sup>). The exact masses of peak 9 ([M+H]<sup>+</sup>) and the C<sub>13</sub> isotope peak of peak 8 ([M+H]<sup>+</sup>) were similar.
